# Supplementary material
Source: PubMed Central journal article supplement (PMC4195415)
Supplement: jn.114.198671_nutrition198671SupplementaryData1.pdf [file jn.114.198671_nutrition198671SupplementaryData1.pdf]

Online Supporting Material

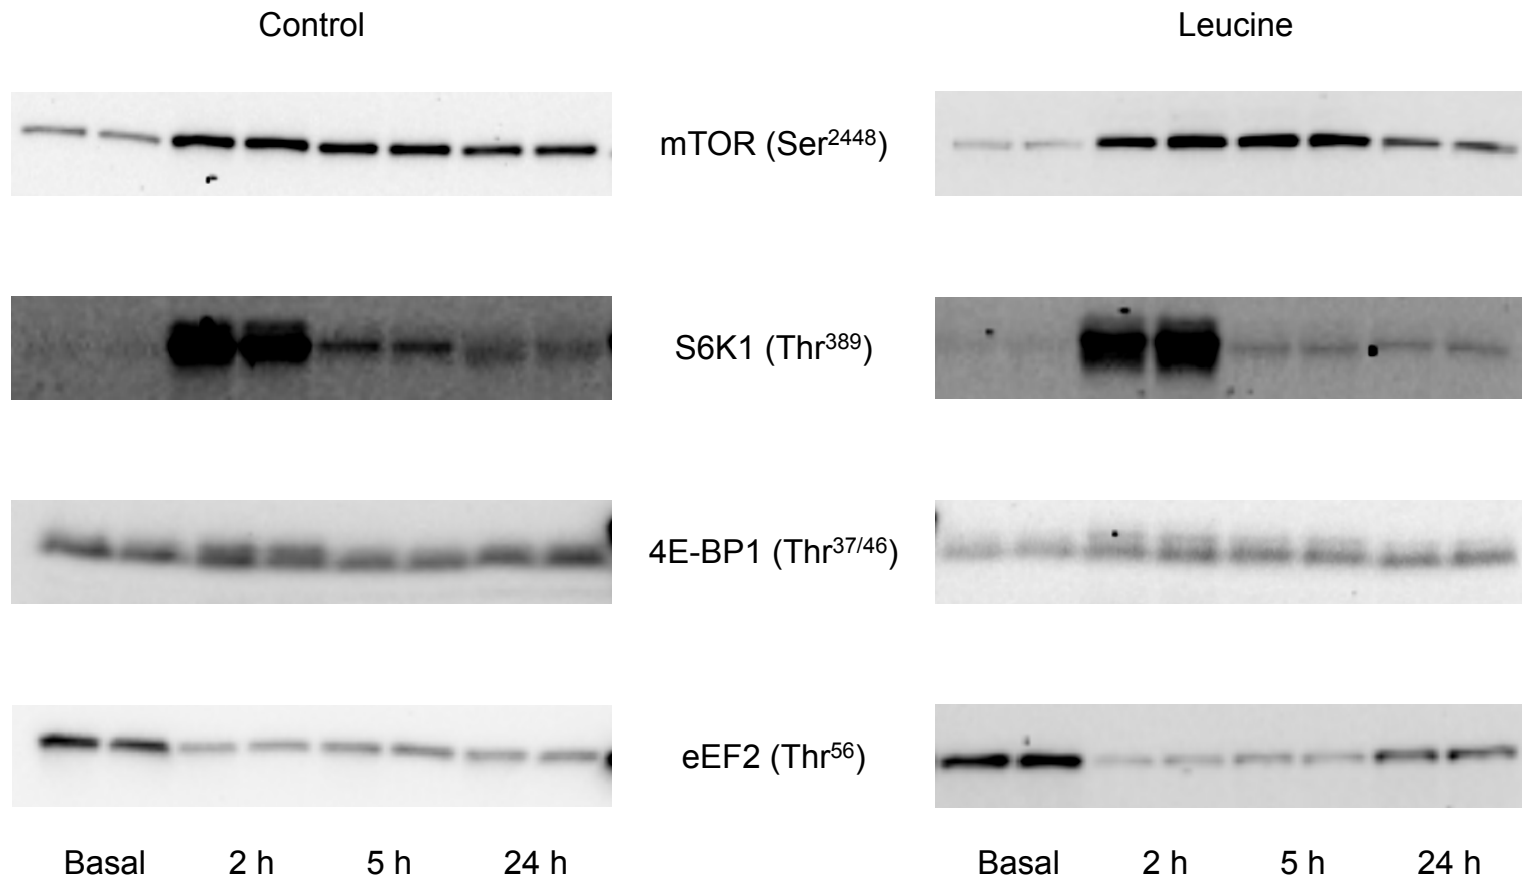

**Supplemental Figure 1.** Representative immunoblot phosphorylated protein images for the Control and Leucine groups skeletal muscle samples at basal, and at 2 h, 5 h and 24 h post resistance exercise. All samples were run in duplicate.
